# Supplementary material
Source: HighWire-hosted journal article supplement (https://cmaj.ca/highwire/filestream/150661/field_highwire_adjunct_files/0/231419-res-1-at.pdf)
Supplement: 231419-res-1-at.pdf [file 231419-res-1-at.pdf]

## Appendix I: Opioid Use Disorder (OUD) Definition

### OUD definition used in study

At least 1 of the following criteria occurring within three years before the last 90 days of life

1.  $\geq 1$  OUD-related emergency department visits;
  - a. NACRS:  $\geq 1$  REGDATEs for a visit that included OUD: NACRS\_DXCODE1-6 “F11.0-F11.9”; (include schedule visits, transfers to/from and not seen)
2.  $\geq 1$  OUD-related hospitalization;
  - a. DAD or OMHRS:  $\geq 1$  ADMDATE for a visit related to OUD \_DX10CODE1-25 “F11.0-F11.9” (include suspected dx)
3. or an OAT prescription (NMS\_DIN) with a three-year lookback (all DINs from ODPRN Master Drug List (15Jan21) where OMT='Y')

### *Legend*

DAD: Discharge Abstract Database

NACRS: National Ambulatory Care Reporting System

OHIP: Ontario Health Insurance Plan

OHMRS: Ontario Mental Health Reporting System

### *Reference*

Gomes T, Kolla G, McCormack D, et al. Clinical outcomes and health care costs among people entering a safer opioid supply program in Ontario. *CMAJ* 2022. doi:10.1503/cmaj.220892.

### Sensitivity analysis of OUD definition

#### **Study definition:**

$\geq 1$  OUD-related emergency department visits,  $\geq 1$  OUD-related hospitalization or OAT within 3 years

This definition identified 11,200 patients with OUD between July 2015 and December 2021.

#### **Variation #1 of study definition:**

$\geq 2$  OUD-related emergency department visits,  $\geq 1$  OUD-related hospitalization or OAT within 3 years:

This definition identified 8,389 patients with OUD between July 2015 and December 2021.

#### **Variation #2 of study definition:**

$\geq 1$  OUD-related emergency department visits,  $\geq 1$  OUD-related hospitalization or OAT within 5 years:

This definition identified 12,376 patients with OUD between July 2015 and December 2021.

#### **Variation #3 of study definition:**

≥2 OUD-related emergency department visits, ≥2 OUD-related hospitalization or OAT within 5 years:

This definition identified 9,246 patients with OUD between July 2015 and December 2021.

**Given patients with OUD can sometimes be very disconnected with the healthcare system and may not regularly access formal healthcare services, we used our study definition.**
